# Supplementary material
Source: ML conference proceedings conference paper supplement (https://aclanthology.org/2020.nuse-1.8)
Supplement: Dataset [file 2020.nuse-1.8.Dataset.zip]

## Citations for Transcripts in Personal Event in Dialogue Corpus

*This American Life* [Episode #608: The Revolution Starts at Noon](#). © 2017 This American Life, PBC. Used with permission. ([Full Transcript](#))

*This American Life* [Episode #610: Grand Gesture](#). © 2017 This American Life, PBC. Used with permission. ([Full Transcript](#))

*This American Life* [Episode #617: Fermi's Paradox](#). © 2017 This American Life, PBC. Used with permission. ([Full Transcript](#))

*This American Life* [Episode #620: To Be Real](#). © 2017 This American Life, PBC. Used with permission. ([Full Transcript](#))

*This American Life* [Episode #622: Who You Gonna Call?](#). © 2017 This American Life, PBC. Used with permission. ([Full Transcript](#))

*This American Life* [Episode #625: Episode B](#). © 2017 This American Life, PBC. Used with permission. ([Full Transcript](#))

*This American Life* [Episode #627: Suitable for Children](#). © 2017 This American Life, PBC. Used with permission. ([Full Transcript](#))

*This American Life* [Episode #629: Expect Delays](#). © 2017 This American Life, PBC. Used with permission. ([Full Transcript](#))

*This American Life* [Episode #639: In Dog We Trust](#). © 2018 This American Life, PBC. Used with permission. ([Full Transcript](#))

*This American Life* [Episode #647: LaDonna](#). © 2018 This American Life, PBC. Used with permission. ([Full Transcript](#))

*This American Life* [Episode #650: Change You Can Maybe Believe In](#). © 2018 This American Life, PBC. Used with permission. ([Full Transcript](#))

*This American Life* [Episode #651: If You Build It, Will They Come?](#). © 2018 This American Life, PBC. Used with permission. ([Full Transcript](#))

*This American Life* [Episode #655: The Not-So-Great Unknown](#). © 2018 This American Life, PBC. Used with permission. ([Full Transcript](#))

*This American Life* [Episode #691 Gardens of Branching Paths](#). © 2020 This American Life, PBC. Used with permission. ([Full Transcript](#))
